# Supplementary material for: Accurate phylogenetic classification of variable-length DNA fragments
Source: Springer Nature journal article supplement (doi:10.1038/nmeth976), 2006-12-10
Supplement: 41592_2007_BFnmeth976_MOESM3_ESM.pdf [file 41592_2007_BFnmeth976_MOESM3_ESM.pdf]

Supplementary Figure 3

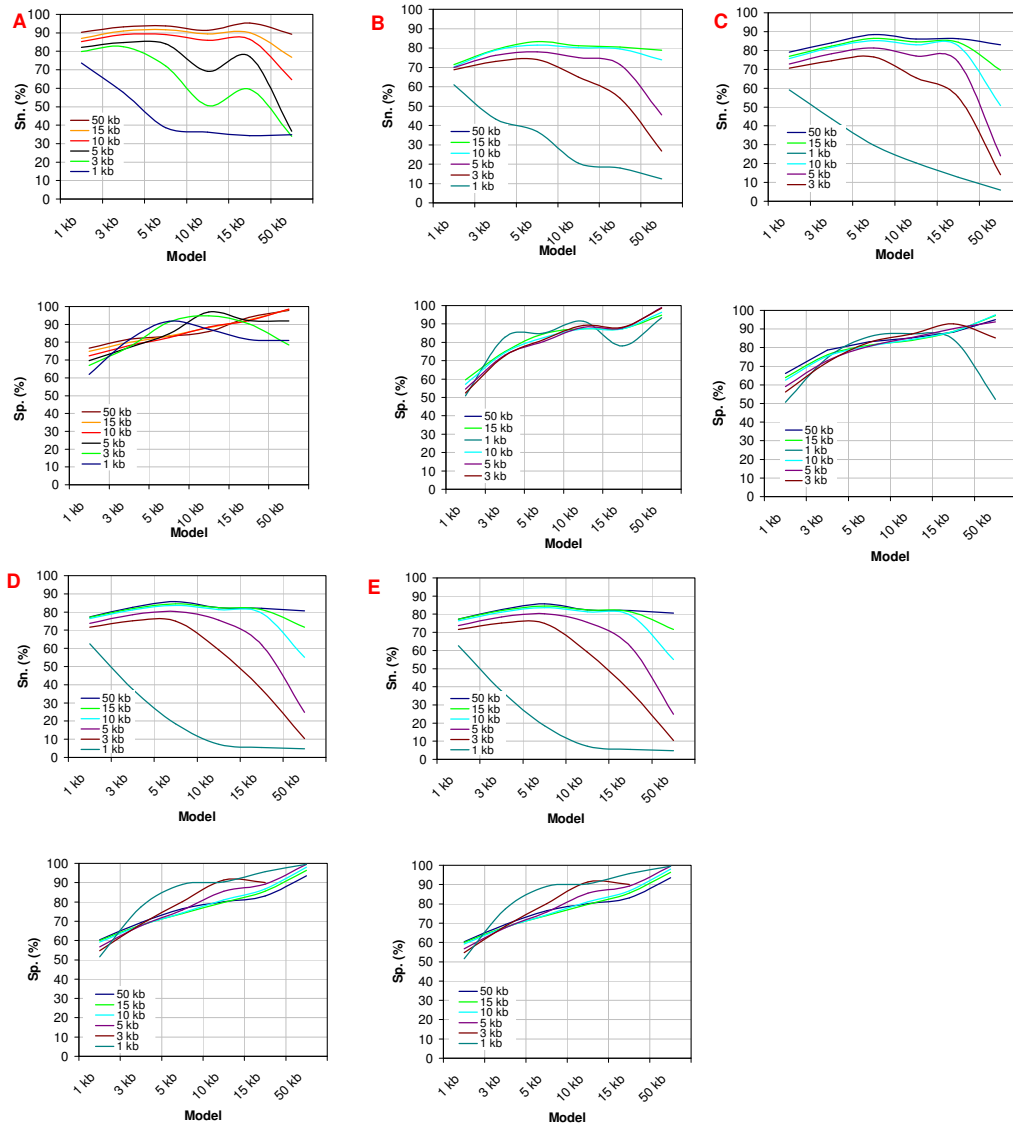

**Supplementary Figure 3.** Evaluation of the relation of genomic fragment (GF) length used for model creation and classification accuracy for genomic fragments of unknown organisms and different lengths. For the level domain (A.  $W_n$  settings  $w6,l6$ ), phylum (B.  $W_n$  settings  $w6,l4$ ), class (C.  $W_n$  settings  $w5,l5$ ), order (D.  $W_n$  settings  $w5,l5$ ) and genus (E.  $W_n$  settings  $w5,l5$ ), the sensitivity ( $Sn.$ ) and specificity ( $Sp.$ ) of classification is displayed for genomic fragments of different lengths with classifiers trained on fragments of different lengths.
