# Supplementary material for: Accurate phylogenetic classification of variable-length DNA fragments
Source: Springer Nature journal article supplement (doi:10.1038/nmeth976), 2006-12-10
Supplement: 41592_2007_BFnmeth976_MOESM5_ESM.pdf [file 41592_2007_BFnmeth976_MOESM5_ESM.pdf]

## Supplementary Figure 5

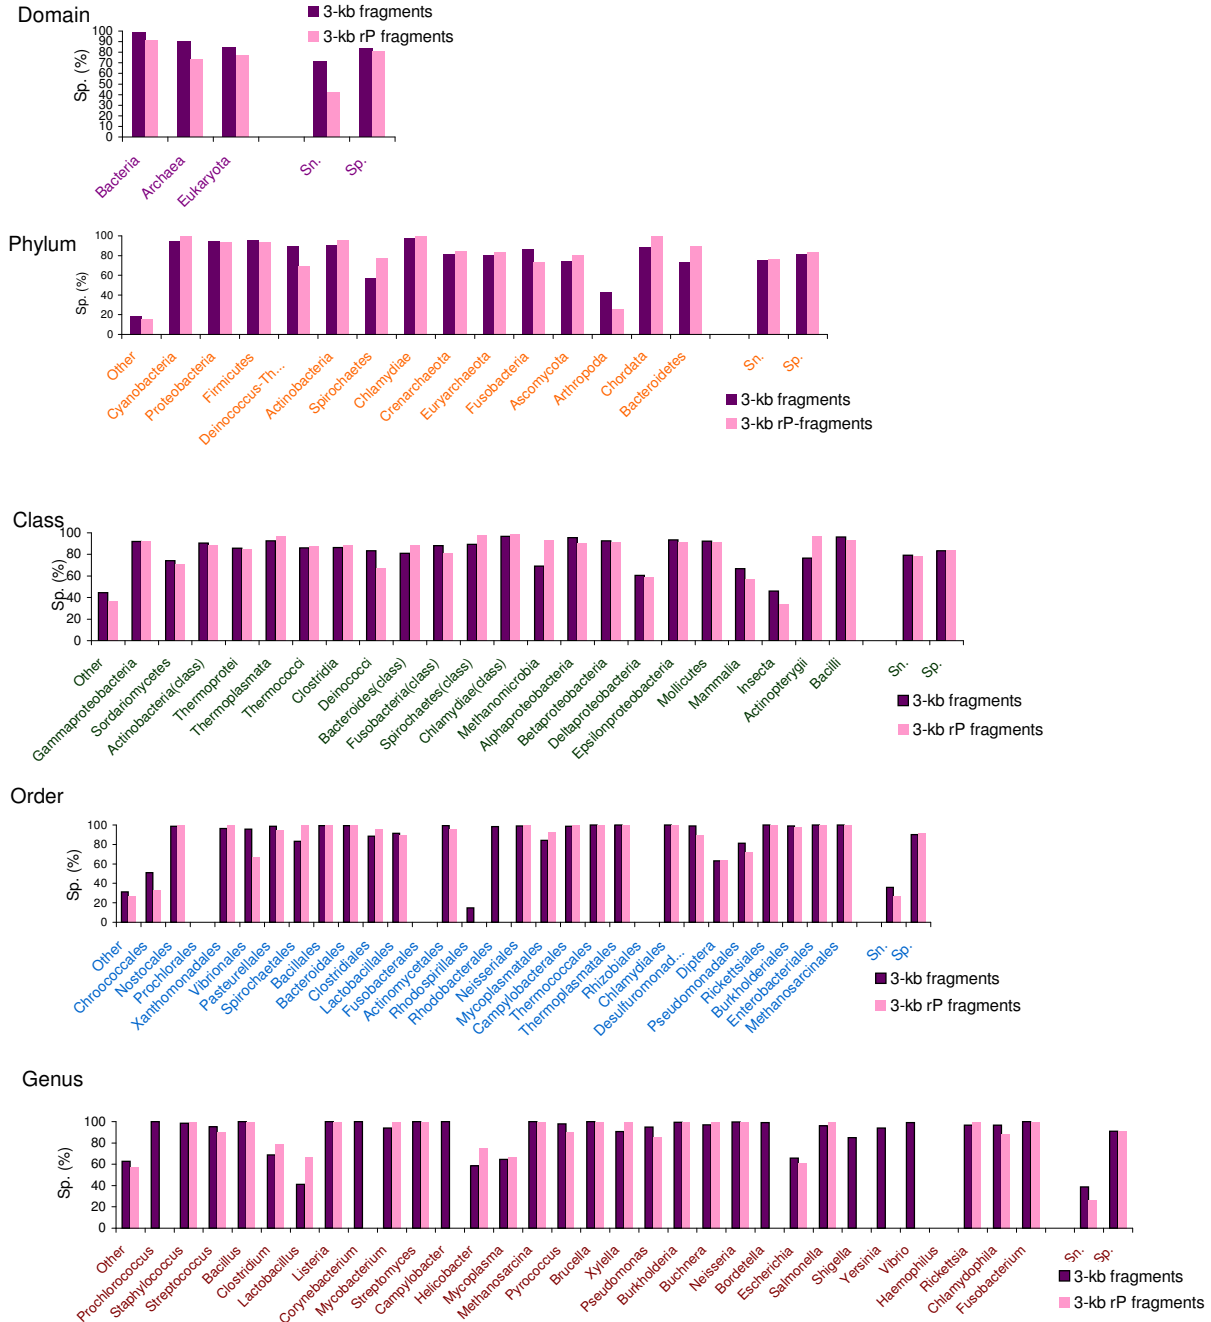

**Supplementary Figure 5.** Comparison of classification accuracy for 3 kb fragments and 3 kb fragments carrying ribosomal proteins (rP-fragments) with *PhyloPythia*. For the clades at the domain, phylum, class, order, and genus level, the specificity of assignment for fragments from organisms unknown to the classifier is displayed, as well as the overall sensitivity and specificity of classification.
