# Supplementary material for: Accurate phylogenetic classification of variable-length DNA fragments
Source: Springer Nature journal article supplement (doi:10.1038/nmeth976), 2006-12-10
Supplement: 41592_2007_BFnmeth976_MOESM6_ESM.pdf [file 41592_2007_BFnmeth976_MOESM6_ESM.pdf]

## Supplementary Figure 6

### Archaea (23)

Crenarchaeota (4)  
Euryarchaeota (18)

Thermoprotei (4)  
Thermoplasmata (4)

Thermoplasmatales (4)  
Thermococcales (3)  
Methanomicrobia (4)  
Methanosarcinales (4)

*Thermococci* (3)  
*Pyrococcus* (3)  
*Methanosarcina* (3)

### Bacteria (291)

Proteobacteria (147)

Gammaproteobacteria (76)

Vibrionales (5)  
Xanthomonadales (7)  
Pasteurellales (12)  
Pseudomonadales (10)  
Enterobacteriales (37)

*Vibrio* (4)  
*Xylella* (4)  
*Haemophilus* (5)  
*Pseudomonas* (7)  
*Buchnera* (3)  
*Escherichia* (7)  
*Salmonella* (8)  
*Shigella* (4)  
*Yersinia* (7)

Alphaproteobacteria (28)

Rhodospirillales (3)  
Rhodobacterales (3)  
Rhizobiales (11)  
Rickettsiales (9)

*Brucella* (3)  
*Rickettsia* (5)  
*Wolbachia* (3)  
*Neisseria* (5)  
*Burkholderia* (7)  
*Bordetella* (4)

Betaproteobacteria (24)

Neisseriales (6)  
Burkholderiales (15)

*Campylobacter* (5)  
*Helicobacter* (4)

Deltaproteobacteria (8)  
Epsilonproteobacteria (10)

Desulfuromonadales (3)  
Campylobacteriales (10)

Cyanobacteria (14)

n. a. (13)

Chroococcales (5)  
Nostocales (3)  
Prochlorales (4)

*Prochlorococcus* (4)

Deinococcus-Thermus (3)  
Actinobacteria (25)

Deinococci (3)  
Actinobacteria (class) (25)

Actinomycetales (21)

*Corynebacterium* (3)  
*Mycobacterium* (8)  
*Streptomyces* (3)

Spirochaetes (6)  
Chlamydiae (9)  
Fusobacteria (3)  
Bacteroidetes (5)  
Firmicutes (72)

Spirochaetes (class) (6)  
Chlamydiae (class) (9)  
Fusobacteria (class) (3)  
Bacteroides (class) (4)  
Clostridia (9)  
Mollicutes (9)  
Bacilli (54)

Spirochaetales (6)  
Chlamydiales (9)  
Fusobacteriales (3)  
Bacteroidales (4)  
Clostridiales (7)  
Mycoplasmatales (6)  
Bacillales (26)

*Chlamydomphila* (6)  
*Fusobacterium* (3)  
*Bacteroides* (3)  
*Clostridium* (6)  
*Mycoplasma* (5)  
*Staphylococcus* (7)  
*Bacillus* (10)  
*Listeria* (5)

Lactobacillales (28)

*Streptococcus* (17)  
*Lactobacillus* (4)

### Eukaryota (26)

Ascomycota (6)  
Arthropoda (4)  
Chordata (9)

Sordariomycetes (3)  
Insecta (4)  
Mammalia (5)  
Actinopterygii (3)

Diptera (3)

**Supplementary Figure 6.** Clades at different depths of the phylogenetic tree that are sufficiently represented by genomes of the 340 organisms for composition-based modeling.
