# Supplementary material for: Accurate phylogenetic classification of variable-length DNA fragments
Source: Springer Nature journal article supplement (doi:10.1038/nmeth976), 2006-12-10
Supplement: 41592_2007_BFnmeth976_MOESM7_ESM.pdf [file 41592_2007_BFnmeth976_MOESM7_ESM.pdf]

Supplementary Table 1

**Supplementary Table 1.**  $W_n$  parameter search for the sequence composition space with the highest classification accuracy. Accuracy is shown for genomic fragments (upper part) and coding sequences (lower part) of 340 unknown organisms (to the classifier) at different phylogenetic levels. The composition space is defined by the word length  $w$ , the number of literal characters  $l$ , and the step size  $s$ . *Acc.* denotes the percentage of correctly assignments for all tested fragments, *Sn.* and *Sp.* are the sensitivity and specificity of the classification. Assignments were performed without the post-processing step in classification.

| Rank          | Data type | $W_n$           | <i>Acc.</i> (%) | <i>Sn.</i> (%) | <i>Sp.</i> (%) |
|---------------|-----------|-----------------|-----------------|----------------|----------------|
| Genus         | 15 kb     | w2,l2,s1        | 38.3            | 37             | 25.5           |
| Genus         | 15 kb     | w3,l2,s1        | 41.7            | 52.1           | 33.1           |
| Genus         | 15 kb     | w3,l3,s1        | 84.3            | 76.6           | 81.9           |
| Genus         | 15 kb     | w4,l4,s1        | 88.1            | 86.3           | 82.9           |
| Genus         | 15 kb     | w6,l4,s1        | 87.2            | 87.9           | 80.8           |
| <b>Genus</b>  | 15 kb     | <b>w5,l5,s1</b> | <b>87.6</b>     | <b>89.1</b>    | <b>80.4</b>    |
| Genus         | 15 kb     | w6,l5,s1        | 86.6            | 88.4           | 79.5           |
| Genus         | 15 kb     | w6,l6,s1        | 86.6            | 88.4           | 79.5           |
| Order         | 15 kb     | w2,l2,s1        | 43.3            | 33.1           | 62.7           |
| Order         | 15 kb     | w3,l2,s1        | 61.3            | 54.3           | 81             |
| Order         | 15 kb     | w3,l3,s1        | 77.1            | 70             | 84             |
| Order         | 15 kb     | w4,l4,s1        | 84.2            | 80.2           | 85.5           |
| Order         | 15 kb     | w6,l4,s1        | 84.9            | 81.1           | 83.9           |
| <b>Order</b>  | 15 kb     | <b>w5,l5,s1</b> | <b>85.1</b>     | <b>81.4</b>    | <b>85.5</b>    |
| Order         | 15 kb     | w6,l5,s1        | 84.9            | 81.1           | 83.9           |
| Order         | 15 kb     | w6,l6,s1        | 84.4            | 81             | 82.9           |
| Class         | 15 kb     | w2,l2,s1        | 43.2            | 39.6           | 68.5           |
| Class         | 15 kb     | w3,l2,s1        | 65.4            | 62.2           | 81.8           |
| Class         | 15 kb     | w3,l3,s1        | 77.9            | 74             | 88.1           |
| Class         | 15 kb     | w4,l4,s1        | 85.7            | 82.8           | 89.1           |
| Class         | 15 kb     | w6,l4,s1        | 87              | 83.8           | 88.8           |
| <b>Class</b>  | 15 kb     | <b>w5,l5,s1</b> | <b>87.1</b>     | <b>84.4</b>    | <b>88.9</b>    |
| Class         | 15 kb     | w6,l5,s1        | 87.2            | 83.8           | 88.5           |
| Class         | 15 kb     | w6,l6,s1        | 86.7            | 83.7           | 87.3           |
| Phylum        | 15 kb     | w2,l2,s1        | 43.1            | 37.2           | 34             |
| Phylum        | 15 kb     | w3,l2,s1        | 53.3            | 48.9           | 44.4           |
| Phylum        | 15 kb     | w3,l3,s1        | 59.6            | 56             | 51             |
| Phylum        | 15 kb     | w4,l4,s1        | 85.7            | 78.5           | 86.2           |
| <b>Phylum</b> | 15 kb     | <b>w6,l4,s1</b> | <b>87.5</b>     | <b>79.6</b>    | <b>87.4</b>    |
| Phylum        | 15 kb     | w5,l5,s1        | 87.2            | 79.4           | 87.8           |
| Phylum        | 15 kb     | w6,l5,s1        | 87.4            | 79.1           | 87.5           |
| Phylum        | 15 kb     | w6,l6,s1        | 87              | 78.6           | 87.8           |
| Domain        | 15 kb     | w2,l2,s1        | 74.5            | 56.5           | 66.5           |
| Domain        | 15 kb     | w3,l2,s1        | 87.7            | 69             | 87.4           |
| Domain        | 15 kb     | w3,l3,s1        | 91              | 76.2           | 92.3           |
| Domain        | 15 kb     | w4,l4,s1        | 94.7            | 84.5           | 93.3           |
| Domain        | 15 kb     | w6,l4,s1        | 95.4            | 86.7           | 91.9           |
| Domain        | 15 kb     | w5,l5,s1        | 95.1            | 87.3           | 92.5           |
| Domain        | 15 kb     | w6,l5,s1        | 95.8            | 88.8           | 92.3           |
| <b>Domain</b> | 15 kb     | <b>w6,l6,s1</b> | <b>95.7</b>     | <b>90.1</b>    | <b>92.5</b>    |

Supplementary Table 1

| Rank          | Data type | Wn              | Acc. (%)    | Sn. (%)     | Sp. (%)     |
|---------------|-----------|-----------------|-------------|-------------|-------------|
| Genus         | CDS       | w2,l2,s1        | 43.1        | 38.1        | 28.7        |
| Genus         | CDS       | w2,l2,s3        | 26.9        | 28.2        | 15.6        |
| Genus         | CDS       | w3,l2,s3        | 40          | 57.8        | 31.7        |
| Genus         | CDS       | w3,l3,s1        | 49.7        | 67.4        | 39.4        |
| Genus         | CDS       | w3,l3,s3        | 49          | 67.1        | 38.5        |
| Genus         | CDS       | w4,l4,s1        | 50.7        | 74.2        | 41.5        |
| Genus         | CDS       | w4,l4,s3        | 51.7        | 75.3        | 42.4        |
| Genus         | CDS       | w6,l4,s3        | 57          | 80.9        | 47.1        |
| Genus         | CDS       | w5,l5,s1        | 52.7        | 76.5        | 43.4        |
| Genus         | CDS       | w5,l5,s3        | 55.1        | 78          | 45.3        |
| Genus         | CDS       | w6,l5,s3        | 57.1        | 81.2        | 47.2        |
| Genus         | CDS       | w6,l6,s1        | 54.5        | 77.6        | 44.7        |
| <b>Genus</b>  | CDS       | <b>w6,l6,s3</b> | <b>58.2</b> | <b>80</b>   | <b>47.9</b> |
| Class         | CDS       | w2,l2,s1        | 34.3        | 36.2        | 35.7        |
| Class         | CDS       | w2,l2,s3        | 19.6        | 27.5        | 26.2        |
| Class         | CDS       | w3,l2,s3        | 40.2        | 50          | 40.6        |
| Class         | CDS       | w3,l3,s1        | 51.1        | 57.5        | 49.2        |
| Class         | CDS       | w3,l3,s3        | 53.9        | 60.9        | 51.3        |
| Class         | CDS       | w4,l4,s1        | 57.1        | 65.3        | 52.5        |
| Class         | CDS       | w4,l4,s3        | 58.3        | 67.9        | 54.5        |
| <b>Class</b>  | CDS       | <b>w6,l4,s3</b> | <b>63.3</b> | <b>72.7</b> | <b>59.2</b> |
| Class         | CDS       | w5,l5,s1        | 57.6        | 66.9        | 53          |
| Class         | CDS       | w5,l5,s3        | 59.4        | 69.8        | 56.6        |
| Class         | CDS       | w6,l5,s3        | 62.3        | 71.9        | 58.5        |
| Class         | CDS       | w6,l6,s1        | 57.8        | 67.7        | 54.2        |
| Class         | CDS       | w6,l6,s3        | 60.6        | 70.2        | 57.5        |
| Phylum        | CDS       | w2,l2,s1        | 40.2        | 37.4        | 35.5        |
| Phylum        | CDS       | w2,l2,s3        | 26.3        | 37.1        | 30.3        |
| Phylum        | CDS       | w3,l2,s3        | 42.4        | 53.9        | 40.5        |
| Phylum        | CDS       | w3,l3,s1        | 57.2        | 57          | 49.1        |
| Phylum        | CDS       | w3,l3,s3        | 58.1        | 58.4        | 50.8        |
| Phylum        | CDS       | w4,l4,s1        | 60.2        | 63.2        | 50.8        |
| Phylum        | CDS       | w4,l4,s3        | 58.9        | 65.1        | 50.8        |
| <b>Phylum</b> | CDS       | <b>w6,l4,s3</b> | <b>63</b>   | <b>69</b>   | <b>54.6</b> |
| Phylum        | CDS       | w5,l5,s1        | 57.5        | 63.3        | 48.9        |
| Phylum        | CDS       | w5,l5,s3        | 57.7        | 66          | 51.4        |
| Phylum        | CDS       | w6,l5,s3        | 61.8        | 68.2        | 54.3        |
| Phylum        | CDS       | w6,l6,s1        | 56.6        | 63.5        | 49.2        |
| Phylum        | CDS       | w6,l6,s3        | 59.9        | 66.6        | 52.7        |
| Domain        | CDS       | w2,l2,s1        | 72.3        | 56.1        | 57.9        |
| Domain        | CDS       | w2,l2,s3        | 61.8        | 61.5        | 54.7        |
| Domain        | CDS       | w3,l2,s3        | 76.8        | 71.6        | 65.7        |
| Domain        | CDS       | w3,l3,s1        | 76.6        | 69.4        | 62.9        |
| Domain        | CDS       | w3,l3,s3        | 82.9        | 78.5        | 71.7        |
| Domain        | CDS       | w4,l4,s1        | 83.4        | 74.2        | 71.8        |
| Domain        | CDS       | w4,l4,s3        | 86          | 80.4        | 75          |
| <b>Domain</b> | CDS       | <b>w6,l4,s3</b> | <b>86.6</b> | <b>82.2</b> | <b>75.5</b> |
| Domain        | CDS       | w5,l5,s1        | 80          | 75.6        | 66.3        |
| Domain        | CDS       | w5,l5,s3        | 84.1        | 79.7        | 72.1        |
| Domain        | CDS       | w6,l5,s3        | 81.5        | 80          | 69.5        |
| Domain        | CDS       | w6,l6,s1        | n.d.        | n.d.        | n.d.        |
| Domain        | CDS       | w6,l6,s3        | 84.4        | 81.1        | 74.1        |
