# Supplementary material for: Accurate phylogenetic classification of variable-length DNA fragments
Source: Springer Nature journal article supplement (doi:10.1038/nmeth976), 2006-12-10
Supplement: 41592_2007_BFnmeth976_MOESM9_ESM.pdf [file 41592_2007_BFnmeth976_MOESM9_ESM.pdf]

Supplementary Table 3

**Supplementary Table 3:** Classification accuracy of *PhyloPythia* for genomic fragments of unknown organisms at different taxonomic ranks. For every clade, the clade-specific sensitivity (class *Sn.*) and specificity (class *Sp.*) is displayed. The two rightmost columns give the overall sensitivity (*Sn.*) and specificity (*Sp.*) of *de novo* sequence classification.

| Rank          | kernel   | Wn    |                      |                         |               |                      |              |               |              |               |              |               |                |                |             |              |               |
|---------------|----------|-------|----------------------|-------------------------|---------------|----------------------|--------------|---------------|--------------|---------------|--------------|---------------|----------------|----------------|-------------|--------------|---------------|
| <b>Domain</b> | Gaussian | 6,6,1 | Bacteria             | Archaea                 | Eukaryota     | Bacteria             | Archaea      | Eukaryota     |              |               |              |               | <i>Sn.</i> (%) | <i>Sp.</i> (%) |             |              |               |
|               | Data     |       | Class <i>Sn.</i> (%) |                         |               | Class <i>Sp.</i> (%) |              |               |              |               |              |               |                |                |             |              |               |
|               | 1 kb     |       | 85.22                | 34.14                   | 53.67         | 97.38                | 77.01        | 69.47         |              |               |              |               | 57.68          | 81.29          |             |              |               |
|               | 3 kb     |       | 92.39                | 48.86                   | 74.88         | 98.86                | 89.92        | 85.13         |              |               |              |               | 72.04          | 91.3           |             |              |               |
|               | 5 kb     |       | 95.9                 | 33.22                   | 78.33         | 98.57                | 99.71        | 92.47         |              |               |              |               | 69.15          | 96.92          |             |              |               |
|               | 10 kb    |       | 96.9                 | 71.84                   | 90.49         | 99.24                | 84.65        | 92.33         |              |               |              |               | 86.41          | 92.07          |             |              |               |
|               | 15 kb    |       | 98.98                | 51.87                   | 79.73         | 98.56                | 97.68        | 99.09         |              |               |              |               | 76.86          | 98.44          |             |              |               |
|               | 50 kb    |       | 98.45                | 75.52                   | 93.6          | 99.54                | 94.91        | 99.32         |              |               |              |               | 89.19          | 97.92          |             |              |               |
| <b>Phylum</b> | Gaussian | 6,4,1 | Other                | Cyanobacteri            | Proteobacteri | Firmicutes           | Deinococcus- | Actinobacteri | Spirochaetes | Chlamydiae    | Crenarchaeot | Euryarchaeot  | Fusobacteria   | Ascomycota     | Arthropoda  | Chordata     | Bacteroidetes |
|               | Data     |       | Class <i>Sn.</i> (%) |                         |               |                      |              |               |              |               |              |               |                |                |             |              |               |
|               | 1 kb     |       | 76.27                | 8.71                    | 64.77         | 12.83                | 34.33        | 50.04         | 44.67        | 0             | 40           | 20.11         | 79.33          | 2.83           | 43          | 89.89        | 41.5          |
|               | 3 kb     |       | 42.27                | 76.64                   | 90.2          | 83.17                | 54.33        | 91.36         | 59.17        | 87.89         | 78           | 73.17         | 96             | 54.5           | 66.25       | 97.33        | 85            |
|               | 5 kb     |       | 34.51                | 85.64                   | 93.2          | 89.4                 | 60.33        | 93.52         | 60.83        | 88.56         | 79.33        | 76.78         | 98             | 71.5           | 66.75       | 98.78        | 92            |
|               | 10 kb    |       | 35.66                | 85.79                   | 94.69         | 89.89                | 64.67        | 94.65         | 33.44        | 88.44         | 83.67        | 81.89         | 98.67          | 81.5           | 81.33       | 99.67        | 86.33         |
|               | 15 kb    |       | 47.23                | 86.43                   | 95.06         | 89.45                | 65.67        | 93.39         | 30.74        | 85.85         | 79.67        | 81.22         | 98.33          | 79.5           | 79.33       | 99.89        | 80.33         |
|               | 50 kb    |       | 36.54                | 86.14                   | 97.68         | 87.83                | 74.85        | 96.3          | 14.74        | 78.79         | 88.28        | 87.64         | 100            | 91.17          | 86.33       | 99.67        | 82.64         |
| <b>Class</b>  | Gaussian | 5,5,1 | Other                | Gamma <del>protec</del> | Sordariomyce  | Actinobacteri        | Thermoprotei | Thermoplasm   | Thermococci  | Clostridia    | Deinococci   | Bacteroides(c | Fusobacteria(  | Spirochaetes(  | Chlamydiae( | Methanomicrc | Alphaproteob  |
|               | Data     |       | Class <i>Sn.</i> (%) |                         |               |                      |              |               |              |               |              |               |                |                |             |              |               |
|               | 1 kb     |       | 92.55                | 26.68                   | 0             | 16.88                | 38           | 25.75         | 10.67        | 3.78          | 26.67        | 48            | 58.67          | 3.17           | 0           | 2.5          | 7.04          |
|               | 3 kb     |       | 70.33                | 87.39                   | 77            | 85.52                | 89.67        | 84.5          | 95           | 65.56         | 54.67        | 94.67         | 94.67          | 60.83          | 84.44       | 55.75        | 81.71         |
|               | 5 kb     |       | 57.81                | 93.21                   | 88            | 90.52                | 91           | 90.75         | 98           | 73.67         | 62.33        | 98.33         | 98.67          | 65.33          | 89          | 64.75        | 91.25         |
|               | 10 kb    |       | 46.79                | 96.12                   | 94.67         | 93.24                | 94.33        | 98.25         | 99           | 76            | 65.33        | 100           | 99.67          | 65.89          | 89          | 79.25        | 93.39         |
|               | 15 kb    |       | 43.87                | 97.13                   | 97            | 93.35                | 96           | 99.25         | 99.33        | 76            | 66           | 100           | 99.33          | 60.74          | 86.27       | 85.5         | 93.67         |
|               | 50 kb    |       | 43.68                | 98.92                   | 96.33         | 95.81                | 99.31        | 100           | 100          | 73.24         | 74.85        | 100           | 100            | 31.09          | 79.65       | 94.58        | 97.68         |
| <b>Order</b>  | Gaussian | 5,5,1 | Other                | hroococcal              | Nostocales    | rochloal             | enthomonad   | Vibrionales   | asteurellal  | epirochaetalk | Bacillales   | bacteroidale  | Clostridiales  | actobacillalk  | usobacteral | tinomycetah  | odospirillal  |
|               | Data     |       | Class <i>Sn.</i> (%) |                         |               |                      |              |               |              |               |              |               |                |                |             |              |               |
|               | 1 kb     |       | 98.92                | 0.25                    | 0             | 0                    | 0            | 0             | 2.92         | 2.67          | 0            | 0             | 0              | 10.21          | 0           | 0            | 0             |
|               | 3 kb     |       | 96.18                | 13.25                   | 28            | 0                    | 51.29        | 17.25         | 70.92        | 20.5          | 10.69        | 61.33         | 36.86          | 76.46          | 0           | 53.62        | 3.33          |
|               | 5 kb     |       | 91.44                | 30.25                   | 88.33         | 2.5                  | 86           | 66.25         | 87.83        | 27.83         | 51.65        | 94.67         | 49.29          | 88.54          | 3.67        | 83.38        | 13.67         |
|               | 10 kb    |       | 83.79                | 48.5                    | 98            | 67.75                | 95.86        | 92.75         | 96.17        | 31.27         | 73.23        | 100           | 60.57          | 94.43          | 95.67       | 94.77        | 31.67         |
|               | 15 kb    |       | 79.84                | 50.25                   | 100           | 73.75                | 97.57        | 98.25         | 98.67        | 28.52         | 84.88        | 100           | 71             | 96.35          | 99.67       | 96.54        | 33.33         |
|               | 50 kb    |       | 74.66                | 47.33                   | 100           | 67.79                | 97.43        | 100           | 99.79        | 14.42         | 90.57        | 100           | 67.6           | 97.31          | 100         | 99.75        | 37.8          |
| <b>Genus</b>  | Gaussian | 5,5,1 | Other                | ochlorococcc            | phylococcc    | treptococcc          | Bacillus     | Clostridium.  | actobacillu  | Listeria      | rynebacteri  | yobacteriu    | treptomyce     | ampylobact     | elicobacte  | lycoplasm    | athanosarci   |
|               | Data     |       | Class <i>Sn.</i> (%) |                         |               |                      |              |               |              |               |              |               |                |                |             |              |               |
|               | 1 kb     |       | 99.05                | 0                       | 0             | 0.35                 | 0            | 0.17          | 7.75         | 0             | 0            | 0             | 0              | 0              | 11.75       | 6.4          | 0             |
|               | 3 kb     |       | 96.56                | 0.75                    | 75.5          | 74.65                | 15.9         | 63.33         | 23           | 30.25         | 4            | 31.14         | 57.33          | 38.8           | 29          | 29.2         | 17.67         |
|               | 5 kb     |       | 93.32                | 26.75                   | 94            | 83.94                | 60.9         | 76.17         | 25           | 73            | 44.33        | 64.29         | 85.67          | 54             | 37          | 43.8         | 52.33         |
|               | 10 kb    |       | 87.53                | 50.5                    | 99            | 92.12                | 85.3         | 81.17         | 31.25        | 96.5          | 71.33        | 89.57         | 99.67          | 58.8           | 53.75       | 52.42        | 78.33         |
|               | 15 kb    |       | 84.9                 | 70                      | 99.67         | 97.53                | 88.2         | 82.5          | 44.27        | 98            | 81.67        | 94.14         | 99             | 85             | 68          | 60.47        | 86            |
|               | 50 kb    |       | 81.96                | 67.79                   | 100           | 99.85                | 89.46        | 83.18         | 46.51        | 99.58         | 98.87        | 97.37         | 99.67          | 100            | 72.52       | 75.25        | 95.73         |

Supplementary Table 3

| Other              | Cyanobacteria       | Proteobacteria        | Firmicutes      | Deinococcus- | Actinobacteria | Spirochaetes   | Chlamydiae   | Crenarchaeot | Euryarchaeot        | Fusobacteria    | Ascomycota     | Arthropoda   | Chordata          | Bacteroidetes | Sr. (%)      | Sp. (%)           |               |
|--------------------|---------------------|-----------------------|-----------------|--------------|----------------|----------------|--------------|--------------|---------------------|-----------------|----------------|--------------|-------------------|---------------|--------------|-------------------|---------------|
| Class Sp. (%)      |                     |                       |                 |              |                |                |              |              |                     |                 |                |              |                   |               |              |                   |               |
| 6.47               | 93.13               | 92.62                 | 97.26           | 91.15        | 93.57          | 42.68          | -            | 93.75        | 94.27               | 82.07           | 73.91          | 29.01        | 78.09             | 71.55         | 40.55        | 79.47             |               |
| 18.06              | 94.37               | 94.94                 | 95.21           | 90.06        | 91.03          | 57.35          | 97.65        | 81.82        | 80.01               | 86.23           | 73.98          | 43.02        | 88.57             | 73.12         | 75.68        | 81.95             |               |
| 24.64              | 93.09               | 94.98                 | 95.03           | 87.02        | 91.04          | 64.49          | 96.96        | 84.4         | 79.98               | 88.55           | 69.98          | 42.58        | 92.51             | 72.73         | 79.28        | 82.38             |               |
| 21.09              | 97.25               | 95.94                 | 97.24           | 88.99        | 92.67          | 60.61          | 98.03        | 95.8         | 83.14               | 98.34           | 74.54          | 50           | 95.94             | 67.8          | 80.02        | 85.45             |               |
| 22.39              | 97.27               | 96.92                 | 98.04           | 94.26        | 95.6           | 71.24          | 96.12        | 97.95        | 88.02               | 100             | 77.81          | 52.31        | 97.51             | 64.61         | 79.47        | 87.69             |               |
| 23.17              | 98.13               | 97.1                  | 99.18           | 98.43        | 98.77          | 75.41          | 82.35        | 93.43        | 86.85               | 100             | 78.59          | 55.46        | 99.78             | 65.56         | 80.57        | 87.79             |               |
| Betaproteobacteria | Deltaproteobacteria | Epsilonproteobacteria | Mollicutes      | Mammalia     | Insecta        | Actinopterygii | Bacilli      | Other        | Gammaproteobacteria | Sordariomycetes | Actinobacteria | Thermoprotei | Thermoplasmata    | Thermococci   | Clostridia   | Deinococci        | Bacteroidetes |
| Class Sp. (%)      |                     |                       |                 |              |                |                |              |              |                     |                 |                |              |                   |               |              |                   |               |
| 33.38              | 7.38                | 83.8                  | 72.33           | 72.5         | 32.5           | 43             | 0.54         | 14.82        | 94.63               | -               | 98.37          | 73.08        | 92.79             | 100           | 97.14        | 86.96             | 80            |
| 85.08              | 48.5                | 94.7                  | 92.67           | 92           | 67.75          | 80             | 80.11        | 44.58        | 92.13               | 74.28           | 90.59          | 85.67        | 92.6              | 86.1          | 86.38        | 83.25             | 80.91         |
| 89.62              | 54.75               | 96.6                  | 94.67           | 96           | 71.75          | 84             | 91.39        | 58.34        | 92.16               | 65.51           | 88.16          | 89.8         | 91.21             | 76.56         | 75.95        | 84.62             | 74.12         |
| 93.08              | 59.75               | 98.2                  | 94.71           | 99           | 77.25          | 92.33          | 95.2         | 67.98        | 92.51               | 63.82           | 84.93          | 93.09        | 95.39             | 72.62         | 74.03        | 83.4              | 70.26         |
| 94                 | 60.62               | 98.9                  | 96.15           | 100          | 79.25          | 95.67          | 96.46        | 71.98        | 92.95               | 62.85           | 83.43          | 95.36        | 93.41             | 69.95         | 74.84        | 84.62             | 68.49         |
| 96.48              | 63.54               | 99.71                 | 97.75           | 99.5         | 84.25          | 96.33          | 97.55        | 82.67        | 93.62               | 65.68           | 87.12          | 94.12        | 92.81             | 69.03         | 85.71        | 91.24             | 72.12         |
| Proteobacteria     | Neisseriales        | Coplasmatata          | Planctobacteria | Thermococci  | Thermoplasmata | Rhizobiales    | Chlamydiales | Leifsoniales | Diptera             | Uromyces        | Rickettsiales  | Chlamydiales | Thermobacteriales | Chlamydiales  | Other        | Thermococci       | Nostocales    |
| Class Sp. (%)      |                     |                       |                 |              |                |                |              |              |                     |                 |                |              |                   |               |              |                   |               |
| 0                  | 16.67               | 0.5                   | 58.5            | 0            | 0.25           | 0              | 0            | 0            | 0                   | 0.8             | 0              | 0            | 0                 | 0             | 22.26        | 100               | -             |
| 38.33              | 75.5                | 47.5                  | 88.3            | 24           | 45             | 0              | 5.89         | 32           | 39.67               | 39.3            | 4.56           | 39.27        | 41.14             | 18.5          | 31.15        | 50.96             | 98.82         |
| 54                 | 79.5                | 60.33                 | 93.5            | 83.33        | 61.75          | 5.3            | 69.44        | 57.67        | 56.33               | 57.9            | 64.89          | 73.73        | 86.08             | 42            | 45.62        | 56.28             | 98.15         |
| 63.33              | 83.17               | 71.83                 | 98              | 95.33        | 90.5           | 86.3           | 88.56        | 70           | 69.67               | 73.5            | 88.78          | 87.47        | 95.16             | 60            | 64.1         | 65.54             | 88.29         |
| 62.67              | 83.33               | 75.58                 | 99.1            | 98.67        | 96.25          | 93.8           | 86.27        | 72.67        | 72                  | 77.5            | 89.14          | 91.73        | 96.4              | 65.75         | 70.65        | 64.01             | 85.96         |
| 65.04              | 69.65               | 75.86                 | 100             | 100          | 100            | 99.87          | 79.22        | 79.62        | 76                  | 86.57           | 96.46          | 95.31        | 97.36             | 84.34         | 77.38        | 68.21             | 78.95         |
| Pyrococcus         | Brucella            | Xylella               | Leifsoniales    | Chlamydiales | Buchnera       | Neisseria      | Bordetella   | Escherichia  | Salmonella          | Shigella        | Yersinia       | Vibrio       | Haemophilus       | Rickettsia    | Chlamydiales | Thermobacteriales | Other         |
| Class Sp. (%)      |                     |                       |                 |              |                |                |              |              |                     |                 |                |              |                   |               |              |                   |               |
| 1                  | 0.33                | 0.75                  | 0               | 0            | 0              | 13             | 0            | 0            | 0                   | 0               | 0              | 0            | 0                 | 1             | 0            | 0                 | 51.27         |
| 64                 | 69                  | 49                    | 35              | 45.14        | 11             | 68.75          | 30.75        | 28.43        | 46.38               | 4.25            | 2.29           | 24.75        | 0                 | 49            | 60.83        | 60.33             | 62.91         |
| 87                 | 93.67               | 70                    | 66              | 74.71        | 65.67          | 72.75          | 66           | 54.71        | 64.5                | 20              | 59.71          | 60.25        | 0.25              | 76.5          | 91.5         | 90.33             | 74.55         |
| 96.33              | 98.33               | 94                    | 85.57           | 94.86        | 94.21          | 86.5           | 73           | 65           | 86.25               | 40.75           | 96.86          | 80           | 80.5              | 96.5          | 99.67        | 99.33             | 85.47         |
| 98.67              | 99.33               | 98.5                  | 94.71           | 98.29        | 98.41          | 95.25          | 75           | 66.71        | 96.5                | 55.5            | 98.29          | 95.75        | 91                | 100           | 99.79        | 99.67             | 90.57         |
| 100                | 100                 | 99.04                 | 99.86           | 99.86        | 100            | 100            | 79.43        | 93.79        | 98.74               | 76.84           | 98.77          | 99.47        | 97.87             | 100           | 100          | 100               | 95.31         |

Supplementary Table 3

| Fusobacteria( Spirochaetes( Chlamydiae( Methanomicr Alpha( Proteob: Betaproteoba( Deltaproteoba( Epsilon( proteo( Mollicutes                                                                                                        |       |       |       |       |       |       |       |       |       |       |       |       | Mammalia | Insecta | Actinopterygii | Bacilli | Sn. (%) | Sp. (%) |
|-------------------------------------------------------------------------------------------------------------------------------------------------------------------------------------------------------------------------------------|-------|-------|-------|-------|-------|-------|-------|-------|-------|-------|-------|-------|----------|---------|----------------|---------|---------|---------|
| 78.92                                                                                                                                                                                                                               | 95    | -     | 83.33 | 98.99 | 94.12 | 64.84 | 81.36 | 84.55 | 54.92 | 39.51 | 62.32 | 100   | 30.69    | 83.04   |                |         |         |         |
| 88.2                                                                                                                                                                                                                                | 89.24 | 96.82 | 69.04 | 95.61 | 92.65 | 60.62 | 93.39 | 92.36 | 66.67 | 45.93 | 76.68 | 96.05 | 79.24    | 83.42   |                |         |         |         |
| 90.24                                                                                                                                                                                                                               | 84.67 | 91.44 | 63.48 | 95.05 | 94.59 | 58.4  | 97.09 | 93.73 | 70.46 | 48.07 | 82.89 | 95.53 | 83.97    | 81.99   |                |         |         |         |
| 92.86                                                                                                                                                                                                                               | 88.14 | 85.12 | 56.71 | 92.4  | 96.67 | 58.79 | 98.69 | 95.07 | 75.57 | 47.69 | 84.97 | 95.54 | 86.98    | 81.74   |                |         |         |         |
| 92.55                                                                                                                                                                                                                               | 87.7  | 77.08 | 55.88 | 91.6  | 97.37 | 57.6  | 99.4  | 95.04 | 76.48 | 50.8  | 92.58 | 95.85 | 87.59    | 81.63   |                |         |         |         |
| 91.24                                                                                                                                                                                                                               | 89.81 | 45.32 | 65.01 | 92.75 | 98.19 | 64.46 | 100   | 96.67 | 78.66 | 55.98 | 98.63 | 94.28 | 87.84    | 82.84   |                |         |         |         |
| Prochloral( enthomonad( Vibrionales( astereu( lal( epirochaeta( Bacillales( lactero( idale( Clostridiales( actobacill( usobacter( al( Actinomyc( Rhodospiri( Rhodobact( Neisseriale( Mycoplas( r( Campylob( e( Thermococ( Thermopla |       |       |       |       |       |       |       |       |       |       |       |       |          |         |                |         |         |         |
| -                                                                                                                                                                                                                                   | -     | -     | 100   | 94.12 | -     | -     | -     | 72.59 | -     | -     | -     | -     | 100      | 100     | 98.32          | -       | 100     |         |
| -                                                                                                                                                                                                                                   | 96.51 | 95.83 | 98.84 | 83.11 | 99.29 | 99.46 | 88.36 | 91.38 | -     | 99.29 | 14.71 | 98.29 | 99.12    | 84.32   | 98.55          | 100     | 100     |         |
| 100                                                                                                                                                                                                                                 | 95.25 | 91.07 | 96.88 | 89.3  | 98.82 | 97.26 | 79.31 | 92.88 | 100   | 96.69 | 24.7  | 99.39 | 98.55    | 74.18   | 99.36          | 99.21   | 99.6    |         |
| 100                                                                                                                                                                                                                                 | 89.59 | 78.11 | 95.37 | 89.47 | 97.99 | 89.29 | 75.58 | 94.84 | 99.31 | 93.2  | 34.55 | 100   | 99.6     | 68.47   | 99.8           | 90.79   | 99.45   |         |
| 100                                                                                                                                                                                                                                 | 91.19 | 70.18 | 92.14 | 88.51 | 98.22 | 86.71 | 79.78 | 96.17 | 99.34 | 91.17 | 33.9  | 98.43 | 100      | 65.04   | 99.9           | 80.22   | 99.23   |         |
| 82.79                                                                                                                                                                                                                               | 95.35 | 67.38 | 87.25 | 95.74 | 96    | 80.43 | 87.83 | 93.89 | 100   | 92.09 | 34.32 | 98.86 | 99.54    | 63.31   | 100            | 72.3    | 96.99   |         |
| Prochlorococ( c( phylococ( c( treptococ( c( Bacillus( Clostridium( actobacill( Listeria( ryne( bacteri( y( cobacteri( utreptomyce( Campylob( e( Helicobact( Mycoplas( r( Methanosa( Pyrococ( c( Brucella( Xylella( Pseudomo         |       |       |       |       |       |       |       |       |       |       |       |       |          |         |                |         |         |         |
| -                                                                                                                                                                                                                                   | -     | 100   | -     | 100   | 15.58 | -     | -     | -     | -     | -     | -     | 97.92 | 65.31    | -       | 100            | 100     | 100     | -       |
| 100                                                                                                                                                                                                                                 | 98.48 | 95.34 | 100   | 68.72 | 41.07 | 100   | 100   | 93.97 | 100   | 100   | 58.59 | 64.6  | 100      | 97.96   | 100            | 90.74   | 94.96   |         |
| 100                                                                                                                                                                                                                                 | 98.43 | 93.88 | 96.36 | 63.83 | 42.37 | 98.98 | 96.38 | 87.89 | 94.83 | 99.63 | 60.41 | 69.3  | 96.32    | 91.58   | 99.29          | 88.61   | 85.08   |         |
| 99.51                                                                                                                                                                                                                               | 98.18 | 93.6  | 91.82 | 60.42 | 47.71 | 93.92 | 91.45 | 84.84 | 82.6  | 100   | 67.82 | 70.83 | 92.89    | 80.28   | 98.33          | 90.82   | 75.35   |         |
| 97.56                                                                                                                                                                                                                               | 99.34 | 94.36 | 89.63 | 59.07 | 59.59 | 94    | 90.07 | 83.21 | 76.35 | 100   | 73.12 | 74.28 | 88.36    | 75.51   | 97.07          | 93.81   | 74.41   |         |
| 80.16                                                                                                                                                                                                                               | 99.4  | 94.92 | 88.91 | 66.48 | 63.49 | 84.53 | 88.38 | 82.36 | 72.05 | 100   | 69.34 | 76    | 83.8     | 68.59   | 97.03          | 95.39   | 72.36   |         |

Supplementary Table 3

| Rhizobiales | Chlamydiales | Desulfuror | Diptera | Pseudomonas | Rickettsiales | Burkholderia | Enterobacteriales | Methanosarcinales | Sn. (%) | Sp. (%) |
|-------------|--------------|------------|---------|-------------|---------------|--------------|-------------------|-------------------|---------|---------|
| -           | -            | -          | -       | 100         | -             | -            | -                 | -                 | 6.39    | 96.11   |
| -           | 100          | 98.97      | 63.3    | 81.37       | 100           | 99.16        | 99.87             | 100               | 35.95   | 89.98   |
| 100         | 100          | 95.58      | 59.72   | 79.21       | 100           | 98.22        | 99.66             | 93.85             | 60.37   | 90.11   |
| 96.75       | 98.15        | 91.7       | 53.18   | 78.44       | 99.13         | 97.84        | 99.28             | 86.02             | 79.53   | 87.92   |
| 94.08       | 94.24        | 90.46      | 52.17   | 77.89       | 97.82         | 97.59        | 98.99             | 83.23             | 82.32   | 86.43   |
| 85.33       | 60.4         | 94.95      | 54.42   | 80.06       | 89.71         | 97.74        | 98.92             | 87.5              | 83.32   | 84.15   |

  

| Burkholderia | Buchnera | Neisseria | Bordetella | Escherichia | Salmonella | Shigella | Yersinia | Vibrio | Haemophilus | Rickettsia | Chlamydox | Fusobacterium | Sn. (%) | Sp. (%) |
|--------------|----------|-----------|------------|-------------|------------|----------|----------|--------|-------------|------------|-----------|---------------|---------|---------|
| -            | -        | 100       | -          | -           | -          | -        | -        | -      | -           | 100        | -         | -             | 4.42    | 87.88   |
| 99.37        | 97.06    | 99.64     | 99.19      | 65.68       | 96.11      | 85       | 94.12    | 99     | -           | 96.55      | 96.82     | 100           | 38.62   | 91.1    |
| 97.39        | 86.78    | 99.32     | 92.96      | 63.52       | 89.9       | 45.71    | 98.35    | 92.69  | 100         | 96.53      | 91.65     | 97.83         | 63.38   | 87.61   |
| 92.35        | 68.85    | 99.71     | 81.11      | 68.32       | 87.79      | 52.58    | 91.5     | 79.01  | 74.88       | 94.38      | 84.23     | 98.35         | 81.09   | 83.66   |
| 90.53        | 62.63    | 99.74     | 75.95      | 73.89       | 87.13      | 55.78    | 86.87    | 75.1   | 61.28       | 89.49      | 83.45     | 99.01         | 87.52   | 82.6    |
| 89.27        | 54.41    | 100       | 69.67      | 86.53       | 85.92      | 73       | 82.54    | 67.02  | 46.62       | 86.24      | 80.23     | 100           | 92.23   | 80.8    |
