# Supplementary material for: Accurate phylogenetic classification of variable-length DNA fragments
Source: Springer Nature journal article supplement (doi:10.1038/nmeth976), 2006-12-10
Supplement: 41592_2007_BFnmeth976_MOESM10_ESM.pdf [file 41592_2007_BFnmeth976_MOESM10_ESM.pdf]

Supplementary Table 4

**Supplementary Table 4:** Phylogenetic classification accuracy of *PhyloPythia* for genomic fragments of known organisms at different taxonomic ranks. For every taxonomic level, the sensitivity (*Sn.*) and specificity (*Sp.*), averaged over all clades where 300+ fragments were available for classification) of *de novo* sequence classification is displayed. The specificity for 50 kb fragments at the genus level is undetermined (n.a.), due to too little available evaluation data.  $\Delta Sn.$  and  $\Delta Sp.$  give the improvement of classification accuracy compared to that for unknown organisms.

| Rank          | GF    | <i>Sn.</i> (%) | <i>Sp.</i> (%) | $\Delta Sn.$ | $\Delta Sp.$ |
|---------------|-------|----------------|----------------|--------------|--------------|
| <b>Domain</b> | 1 kb  | 57.71          | 88.68          | 0.03         | 7.39         |
|               | 3 kb  | 92.35          | 90.7           | 20.31        | -0.6         |
|               | 5 kb  | 96.03          | 98.28          | 26.88        | 1.36         |
|               | 10 kb | 98.15          | 98.03          | 11.74        | 5.96         |
|               | 15 kb | 97.59          | 99.72          | 20.73        | 1.28         |
|               | 50 kb | 99.8           | 99.95          | 10.61        | 2.03         |
| <b>Phylum</b> | 1 kb  | 50.32          | 92.11          | 9.77         | 12.64        |
|               | 3 kb  | 94.75          | 94.84          | 19.07        | 12.89        |
|               | 5 kb  | 96.53          | 94.73          | 17.25        | 12.35        |
|               | 10 kb | 97.93          | 97.22          | 17.91        | 11.77        |
|               | 15 kb | 98.77          | 98.61          | 19.3         | 10.92        |
|               | 50 kb | 97.99          | 98.82          | 17.42        | 11.03        |
| <b>Class</b>  | 1 kb  | 30.76          | 93.21          | 0.07         | 10.17        |
|               | 3 kb  | 94.64          | 94.29          | 15.4         | 10.87        |
|               | 5 kb  | 96.93          | 93.75          | 12.96        | 11.76        |
|               | 10 kb | 97.65          | 96.19          | 10.67        | 14.45        |
|               | 15 kb | 98.9           | 98.72          | 11.31        | 17.09        |
|               | 50 kb | 99.53          | 98.45          | 11.69        | 15.61        |
| <b>Order</b>  | 1 kb  | 25.12          | 95.04          | 18.73        | -1.07        |
|               | 3 kb  | 94.18          | 93.89          | 58.23        | 3.91         |
|               | 5 kb  | 96.93          | 92.75          | 36.56        | 2.64         |
|               | 10 kb | 98.5           | 96.79          | 18.97        | 8.87         |
|               | 15 kb | 98.66          | 96.7           | 16.34        | 10.27        |
|               | 50 kb | 99.66          | 98.61          | 16.34        | 14.46        |
| <b>Genus</b>  | 1 kb  | 7.11           | 96.72          | 2.69         | 8.84         |
|               | 3 kb  | 69.16          | 92.5           | 30.54        | 1.4          |
|               | 5 kb  | 95.43          | 89.18          | 32.05        | 1.57         |
|               | 10 kb | 98.07          | 83.68          | 16.98        | 0.02         |
|               | 15 kb | 96.63          | 87.82          | 9.11         | 5.22         |
|               | 50 kb | 99.52          | n.a.           | 7.29         | n.a.         |
