# Supplementary material for: Accurate phylogenetic classification of variable-length DNA fragments
Source: Springer Nature journal article supplement (doi:10.1038/nmeth976), 2006-12-10
Supplement: 41592_2007_BFnmeth976_MOESM11_ESM.pdf [file 41592_2007_BFnmeth976_MOESM11_ESM.pdf]

## Supplementary Table 5

**Supplementary Table 5:** Search for the best parameter settings for the SOM and TETRA-method. The results of the SOM and the binning of fragments by tetranucleotide-based correlation coefficients for the dominant sample populations are shown for the Sargasso sea reference set of ssu rRNA assigned high-coverage contigs (and contigs linked to those via a common scaffold). Dark blue bars indicate the determined parameter setting. For the TETRA-method, a correlation coefficient of 0.8 was chosen as the cut-off, the lowest setting with the same specificity as *PhyloPythia*. For the SOM, assigning a phylotype based on the overall counts for this phylotype for all 1kb fragments of a contig was found to fare slightly better. The SOMs results give counts for 25 manually defined phylotypes found at the position of the SOM where an analyzed 1 kb fragment was placed. The 25 phylotype groupings of the SOM are non-overlapping groups, but at different taxonomic ranks of NCBI Taxonomy. For a comparison with our technique, we give the results derived for contigs at class level for the subset of sequences, where it applies, and at phylum level, where for each lower-level clade a parent is defined. '# Contigs' gives the number of contigs that are part of each clade in the reference. The notation 'x (y)' denotes for each of the clades the number of correctly assigned fragments x and the number of false positive assignments y. 'A' denotes the percentage of correctly assigned items (note that unassigned items are counted 'false'), and Sp. the specificity of assignments. For the higher-level Sp.-values, assignments are counted as 'false' that are not assigned to a node at a level, but are annotated with a parent node that disagrees with the current level assignments (e.g. Proteobacteria as an assignment for an archaeal node).

| Dominant sample pops. | A           | Sp. (%)    | Prochlorococcus |
|-----------------------|-------------|------------|-----------------|
| # Contigs             | 46          |            | 8               |
| TETRA*0.6             | 0.50        | 82         | 1 (0)           |
| TETRA*0.7             | 0.46        | 95         | 0 (0)           |
| <b>TETRA*0.8</b>      | <b>0.39</b> | <b>100</b> | <b>0 (0)</b>    |
| TETRA*0.9             | 0.20        | 100        | 0 (0)           |

| Class-level                         | A             | Sp. (%)    | Cyanobacteria |
|-------------------------------------|---------------|------------|---------------|
| # Contigs                           | 46            |            | 8             |
| <b>SOM<sub>byContigCounts</sub></b> | <b>0.2</b>    | <b>100</b> | <b>0 (0)</b>  |
| SOM <sub>FragmentMajorityVote</sub> | 0.17          | 89         | 0 (0)         |
| Phylum-level                        | Cyanobacteria |            |               |
| # Contigs                           | 47            |            | 8             |
| <b>SOM<sub>byContigCounts</sub></b> | <b>0.19</b>   | <b>82</b>  | <b>0 (0)</b>  |
| SOM <sub>FragmentMajorityVote</sub> | 0.19          | 82         | 0 (0)         |

| Dominant sample pops. | Burkholderia | Shewanella   | Other organisms  |
|-----------------------|--------------|--------------|------------------|
| # Contigs             | 8            | 13           | 32               |
| TETRA*0.6             | 7 (0)        | 8 (0)        | 27 (n.a.)        |
| TETRA*0.7             | 7 (0)        | 7 (0)        | 31 (n.a.)        |
| <b>TETRA*0.8</b>      | <b>7 (0)</b> | <b>7 (6)</b> | <b>32 (n.a.)</b> |
| TETRA*0.9             | 6 (0)        | 3 (0)        | 32 (n.a.)        |

| Class-level                         | Betaproteobacteria | Gammaproteobacteria |
|-------------------------------------|--------------------|---------------------|
| # Contigs                           | 8                  | 30                  |
| <b>SOM<sub>byContigCounts</sub></b> | <b>7 (0)</b>       | <b>2 (0)</b>        |
| SOM <sub>FragmentMajorityVote</sub> | 6 (1)              | 2 (0)               |
| Phylum-level                        | Proteobacteria     | Other organisms     |
| # Contigs                           | 38                 | 1                   |
| <b>SOM<sub>byContigCounts</sub></b> | <b>9 (1)</b>       | <b>0 (1)</b>        |
| SOM <sub>FragmentMajorityVote</sub> | 9 (1)              | 0 (1)               |
