# Supplementary material for: Accurate phylogenetic classification of variable-length DNA fragments
Source: Springer Nature journal article supplement (doi:10.1038/nmeth976), 2006-12-10
Supplement: 41592_2007_BFnmeth976_MOESM12_ESM.pdf [file 41592_2007_BFnmeth976_MOESM12_ESM.pdf]

Supplementary Table 6

**Supplementary Table 6:** Comparison of *PhyloPythia* to the SOM-phyloptype associations and tetranucleotide-based binning of the dominant sample populations for the contigs  $\geq 1$ kb of the Sargasso Sea sample. The upper part gives the respective values for the high-coverage contigs only; the lower part for the complete set of all contigs  $\geq 1$ kb. The 25 phylotype groupings of the SOM are non-overlapping groups but at different taxonomic ranks of NCBI Taxonomy. For comparison with our technique, we give the results at class level for the subset of sequences where it applies, and at phylum level, where for each lower-level clade a parent is defined. '# Contigs' gives the number of contigs that are part of each clade in the reference. The notation ' $x$  ( $y$ )' denotes for each of the clades the number of correctly assigned fragments  $x$  and the number of false positive assignments  $y$ . 'A' denotes the percentage of correctly assigned items (note that unassigned items are counted 'false'), 'Asg.' denotes the percentage of assigned items and *Sp.* the specificity of assignments. For the higher-level *Sp.*-values, assignments are counted as 'false' that are not assigned to a node at a level, but are annotated with a parent node that disagrees with the current level assignments (e.g. Proteobacteria as an assignment for an archaeal node).

| Dominant sample pops.                             | <i>A</i> <sub>contig</sub> (%) | <i>Asg</i> <sub>contig</sub> (%) | <i>Sp</i> <sub>contig</sub> (%) | <i>A</i> <sub>nt</sub> (%) | <i>Asg</i> <sub>nt</sub> (%) | <i>Sp</i> <sub>nt</sub> (%) |
|---------------------------------------------------|--------------------------------|----------------------------------|---------------------------------|----------------------------|------------------------------|-----------------------------|
| # Contigs <sub>SSU:rRNA-highcoveragecontigs</sub> | 46                             |                                  |                                 | 1,902,990                  |                              |                             |
| PhyloPythia <sub>ab</sub>                         | 72                             | 72                               | 100                             | 98.21                      | 98.21                        | 100                         |
| TETRA*                                            | 39                             | 39                               | 100                             | 93.87                      | 93.87                        | 100                         |
| <b>Class-level</b>                                |                                |                                  |                                 |                            |                              |                             |
| # Contigs <sub>SSU:rRNA-highcoveragecontigs</sub> | 46                             |                                  |                                 | 1,902,990                  |                              |                             |
| PhyloPythia <sub>c</sub>                          | 74                             | 78                               | 94                              | 98.94                      | 99.08                        | 99.86                       |
| SOM                                               | 20                             | 19                               | 100                             | 49.21                      | c                            | 100                         |

| Dominant sample pops.                                   |      |      |      |           |       |       |
|---------------------------------------------------------|------|------|------|-----------|-------|-------|
| # Contigs <sub>SSU:rRNA<math>\geq</math>1kcontigs</sub> | 69   |      |      | 1,994,724 |       |       |
| PhyloPythia <sub>ab</sub>                               | 53.6 | 53.6 | 100  | 96.36     | 96.36 | 100   |
| TETRA*                                                  | 27.5 | 27.5 | 100  | 90.79     | 90.79 | 100   |
| <b>Class-level</b>                                      |      |      |      |           |       |       |
| # Contigs <sub>SSU:rRNA<math>\geq</math>1kcontigs</sub> | 333  |      |      | 2,091,355 |       |       |
| PhyloPythia <sub>c</sub>                                | 18   | 27.3 | 62.5 | 75.89     | 80.3  | 93.48 |
| SOM                                                     | 4.2  | 6.6  | 60.9 | 35.99     | 36.7  | 97.86 |
| <b>Phylum-level</b>                                     |      |      |      |           |       |       |
| # Contigs <sub>SSU:rRNA<math>\geq</math>1kcontigs</sub> | 393  |      |      | 2,632,674 |       |       |
| PhyloPythia <sub>c</sub>                                | 26.7 | 52.2 | 48   | 76.64     | 86.63 | 86.66 |
| SOM                                                     | 5.3  | 33.3 | 15.9 | 35.02     | 45.6  | 76.67 |

| Dominant sample pops.                             | Burkholderia       | Shewanella          | New Gammaproteobacteria | Other organisms |
|---------------------------------------------------|--------------------|---------------------|-------------------------|-----------------|
| # Contigs <sub>SSU:rRNA-highcoveragecontigs</sub> | 8                  | 13                  | 17                      | 32              |
| PhyloPythia <sub>ab</sub>                         | 7 (0)              | 11 (0)              | 13 (0)                  | 32 (-)          |
| TETRA*                                            | 7 (0)              | 7 (0)               | 4 (0)                   | 32 (-)          |
| <b>Class-level</b>                                |                    |                     |                         |                 |
|                                                   | Betaproteobacteria | Gammaproteobacteria |                         |                 |
| # Contigs <sub>SSU:rRNA-highcoveragecontigs</sub> | 8                  | 30                  |                         |                 |
| PhyloPythia <sub>c</sub>                          | 7 (1)              | 25 (0)              |                         |                 |
| SOM                                               | 7 (0)              | 2 (0)               |                         |                 |

| Dominant sample pops.                                   | Burkholderia       | Shewanella          | New Gammaproteobacteria |                |            |                  |  |
|---------------------------------------------------------|--------------------|---------------------|-------------------------|----------------|------------|------------------|--|
| # Contigs <sub>SSU:rRNA<math>\geq</math>1kcontigs</sub> | 19                 | 23                  | 17                      |                |            |                  |  |
| PhyloPythia <sub>ab</sub>                               | 8 (0)              | 14 (0)              | 13 (0)                  |                |            |                  |  |
| TETRA*                                                  | 7 (0)              | 8 (0)               | 4(0)                    |                |            |                  |  |
| <b>Class-level</b>                                      |                    |                     |                         |                |            |                  |  |
|                                                         | Betaproteobacteria | Gammaproteobacteria | Alphaproteobacteria     | Flavobacteria  | Mollicutes | Planctomycetacia |  |
| # Contigs <sub>SSU:rRNA<math>\geq</math>1kcontigs</sub> | 20                 | 190                 | 80                      | 28             | 1          | 2                |  |
| PhyloPythia <sub>c</sub>                                | 16 (0)             | 41 (15)             | 1 (9)                   | 0 (5)          | 0 (0)      | 0 (0)            |  |
| SOM                                                     | 7 (0)              | 7 (4)               | 0 (3)                   | 0 (1)          | 0 (0)      | 0 (0)            |  |
| <b>Phylum-level</b>                                     |                    |                     |                         |                |            |                  |  |
|                                                         | Bacteroidetes      | Firmicutes          | Planctomycetes          | Proteobacteria |            |                  |  |
| # Contigs <sub>SSU:rRNA<math>\geq</math>1kcontigs</sub> | 28                 | 1                   | 2                       | 350            |            |                  |  |
| PhyloPythia <sub>c</sub>                                | 0 (12)             | 0 (0)               | 0 (0)                   | 99 (86)        |            |                  |  |
| SOM                                                     | 0 (15)             | 0 (0)               | 0 (0)                   | 21 (95)        |            |                  |  |
