# Supplementary material for: Accurate phylogenetic classification of variable-length DNA fragments
Source: Springer Nature journal article supplement (doi:10.1038/nmeth976), 2006-12-10
Supplement: 41592_2007_BFnmeth976_MOESM13_ESM.pdf [file 41592_2007_BFnmeth976_MOESM13_ESM.pdf]

Supplementary Table 7

**Supplementary Table 7:** Evaluation of *PhyloPythia*'s classification accuracy for genome fragments of different *Prochlorococcus* strains. At the extremes, the average genomic GC content differs by more than 27% (column % GC). Column Accuracy<sub>1</sub> gives the success rate in assigning 50 kb *Prochlorococcus* fragments as *Prochlorococcus* (in all cases as opposed to non-*Prochlorococcus*, built with non-*Prochlorococcus* fragments from the completed genomes) with models built from fragments of opposing GC content (e.g. the assignment of low GC content sequences with the high GC content model). Column Accuracy<sub>2</sub> gives the assignment accuracy in a 'leave-one out' experiment, where the *Prochlorococcus*-model was trained with fragments from all genomes except the one being tested. Column Accuracy<sub>3</sub> gives the assignment accuracy for an all-genome-*Prochlorococcus*-model, which was built from fragments of all of the genomes.

| TaxID  | Name                                                                | % GC | Accuracy <sub>1</sub><br>(Opp. GC-models) | Accuracy <sub>2</sub><br>(Leave-one-out model) | Accuracy <sub>3</sub><br>(All genomes model) |
|--------|---------------------------------------------------------------------|------|-------------------------------------------|------------------------------------------------|----------------------------------------------|
| 167539 | <i>Prochlorococcus marinus</i> subsp. <i>marinus</i> str. CCMP1375  | 36.5 | 97.6                                      | 100                                            | 100                                          |
| 59919  | <i>Prochlorococcus marinus</i> subsp. <i>pastoris</i> str. CCMP1986 | 30.8 | 0.7                                       | 100                                            | 100                                          |
| 59920  | <i>Prochlorococcus marinus</i> str. NATL2A                          | 35.1 | 72.6                                      | 100                                            | 100                                          |
| 74546  | <i>Prochlorococcus marinus</i> str. MIT 9312                        | 31.2 | 1.7                                       | 100                                            | 100                                          |
| 74547  | <i>Prochlorococcus marinus</i> str. MIT 9313                        | 50.7 | 0                                         | 0                                              | 100                                          |
| 93059  | <i>Prochlorococcus marinus</i> str. MIT 9211                        | 58.2 | 93.1                                      | 94                                             | 100                                          |
